# Supplementary material for: Mapping the epidemiological distribution and incidence of major zoonotic diseases in South Tigray, North Wollo and Ab’ala (Afar), Ethiopia
Source: PLoS One. 2018 Dec 31;13(12):e0209974. doi: 10.1371/journal.pone.0209974 (PMC6312287; doi:10.1371/journal.pone.0209974)
Supplement: S1 Table — (XLSX) [file pone.0209974.s005.xlsx]

## Sheet: GPS with OPD
	GPS data points of the health facilities
	District	Health facility	Latitude	Longitude
	Alamata	Alamata Hospital	12.423	39.5554
	Alamata	Alamata HC	12.4182	39.5602
	Alamata	Waja HC	12.2861	39.6018
	Alamata	Timuga HC, VSC	12.3153	39.5986
	Alamata	Lmat HP	12.3526	39.5819
	Alamata	Garjale HC,VSC	12.482	39.6109
	Alamata	Tao HP	12.512	39.6348
	Raya-azebo	Mechare HC, VSC	12.7673	39.812
	Raya-azebo	Mehoni Hospital	12.7992	39.644
	Raya-azebo	Kukufto HC,VSC	12.6188	39.6508
	Ofla	Korem HC,VSC	12.5148	39.5157
	Ofla	Ashenge HC, VSC	12.592	39.5101
	Endamehoni	Maichew Lemlem Karl Hospital, HC	12.7903	39.5454
	Endamehoni	Maichew HC	12.7812	39.5362
	Endamehoni	Shimta HC	12.7932	39.5022
	Endamehoni	Meswaity HC	12.6962	39.5438
	Weldiya	D/gelila Hospital	11.834	39.6074
	Weldiya	Y/genet HC	11.8211	39.5941
	G/Lafto	Jarsa HC	11.8317	39.5225
	G/Lafto	Keyamba HP	11.8285	39.5085
	G/Lafto	Dorogibir HP	11.8609	39.669
	G/Lafto	Hara HC	11.8414	39.7413
	G/Lafto	G/sibelkay HP	11.8031	39.7526
	Raya-kobo	Gobiye HC	11.9449	39.6668
	Raya-kobo	Robit HC	12.0119	39.6256
	Raya-kobo	Aradum HC	12.0719	39.6229
	Raya-kobo	Golesha HC	12.2521	39.6682
	Raya-kobo	Jarota HP	12.2768	39.6247
	Ab'Ala	Haramele VSC, HP	13.3222	39.7689
	Ab'Ala	W/gubi HC	13.3482	39.754
	Ab'Ala	Lemlem Hospital	13.3591	39.7568
	Ab'Ala	Hidmo HP	13.3773	39.7779
	Ab'Ala	Urkudi HP, VSC	13.3793	39.8065
